# Supplementary material for: Detection and Identification of Pesticides in Fruits Coupling to an Au–Au Nanorod Array SERS Substrate and RF-1D-CNN Model Analysis
Source: MDPI journal article supplement (doi:10.3390/nano14080717), 2024-04-19
Supplement: s1 [file s1]

# Detection and identification of pesticides in fruits coupling to an Au-Au nanorod array SERS substrate and RF-1D-CNN model analysis

Pengxing Sha<sup>1,†</sup>, Chu-shu Zhu<sup>1,†</sup>, Tianran Wang<sup>1</sup>, Peitao Dong<sup>1,\*</sup> and Xuezhong Wu<sup>1</sup>

<sup>1</sup> College of Intelligence Science and Technology, National University of Defense Technology, Changsha 410073, People's Republic of China

<sup>†</sup> These authors contributed equally to this work.

\* Correspondence: ptdong@nudt.edu.cn; Tel.: +86-731-87005236.

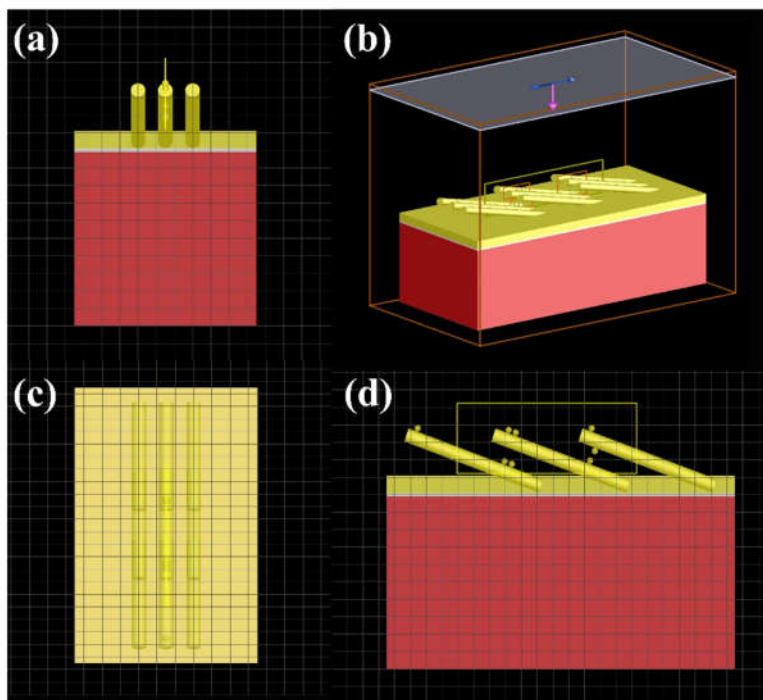

**Figure S1.** Models of the Au–Au core-shell nanorod array (NRA) substrate.

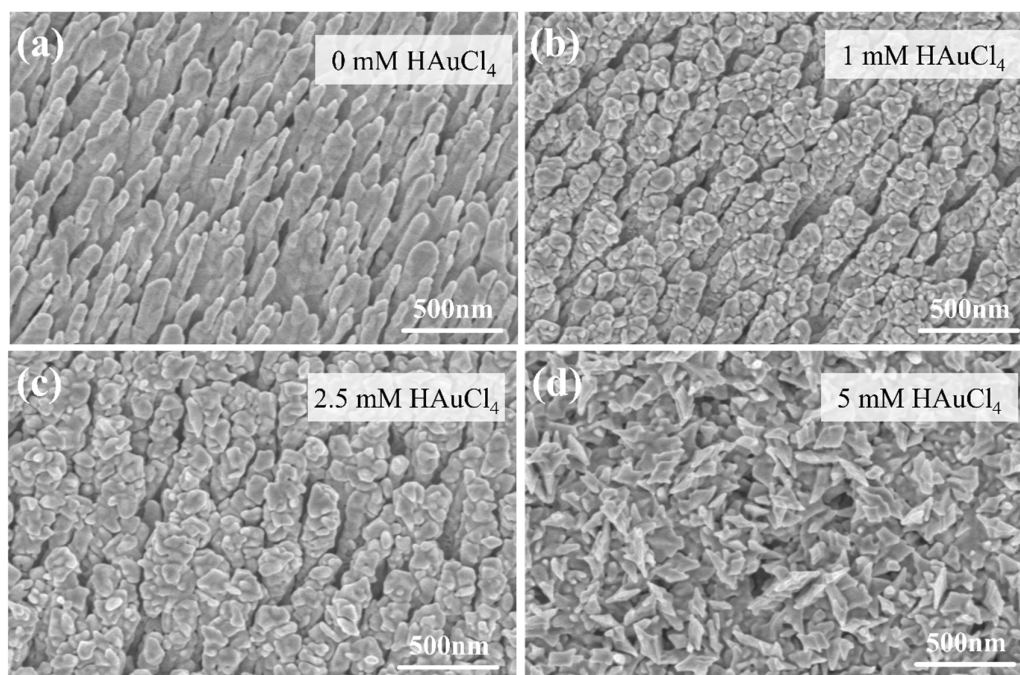

**Figure S2.** SEM images of the Au-Au NRA composite structure with (a) 0 mM  $\text{HAuCl}_4$ ; (b) 1 mM  $\text{HAuCl}_4$ ; (c) 2.5 mM  $\text{HAuCl}_4$ ; (d) 5 mM  $\text{HAuCl}_4$ . The reaction time was kept at 10 min.

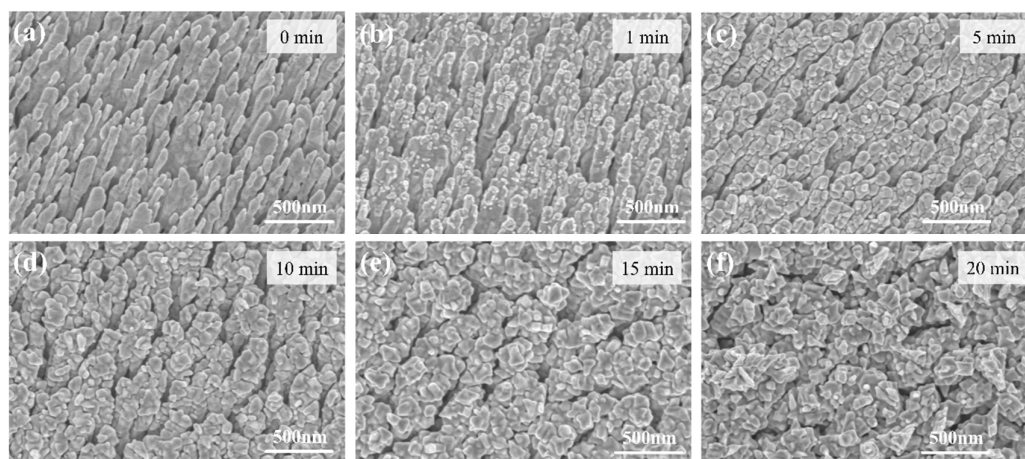

**Figure S3.** (a–f) SEM images of the Au-Au NRA composite structure after different durations of Au deposition. The concentration of  $\text{HAuCl}_4$  was maintained at 2.5 mM.

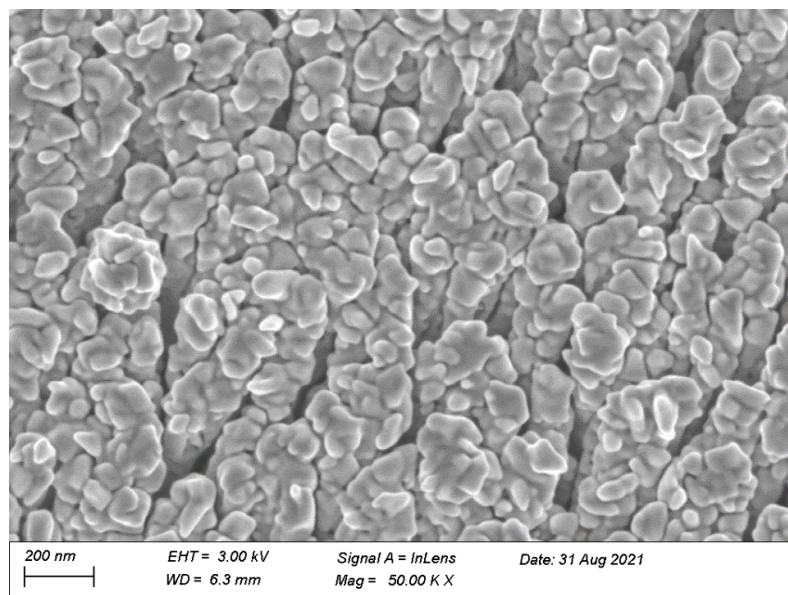

**Figure S4.** Au-Au NRA observed under high magnification view after reacting with 2.5 mM HAuCl<sub>4</sub> for 10 min.

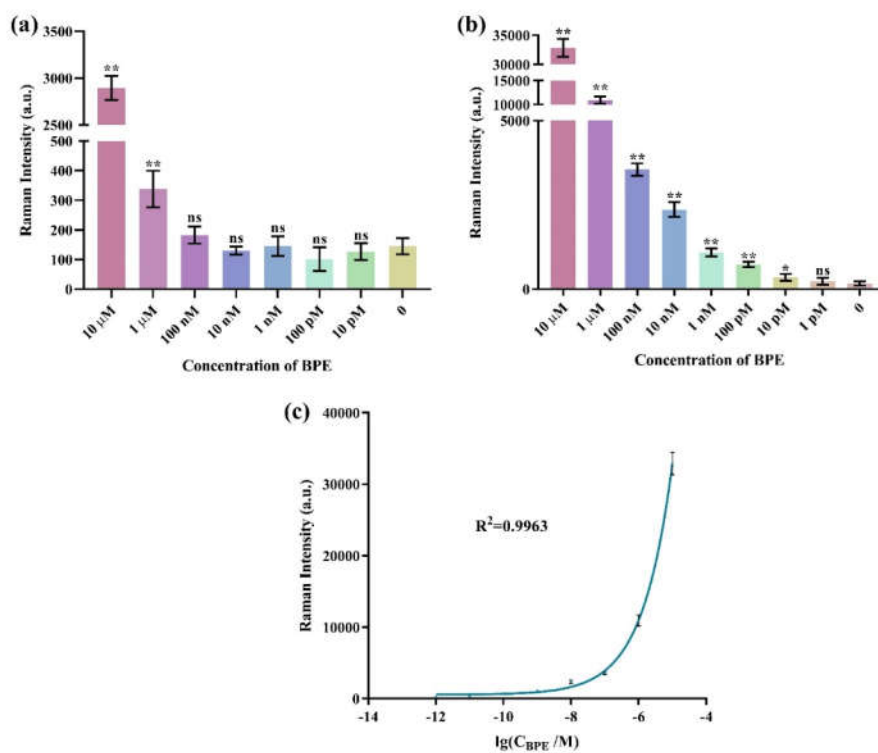

**Figure S5.** Histograms of Raman intensity at 1636 cm<sup>-1</sup> detected for pure AuNRA (a) and Au-Au NRA(b). (c). calibration curve of Raman intensity at 1636 cm<sup>-1</sup> detected for Au-Au NRA. (\*P < 0.05, \*\*P < 0.01, ns: No significance)

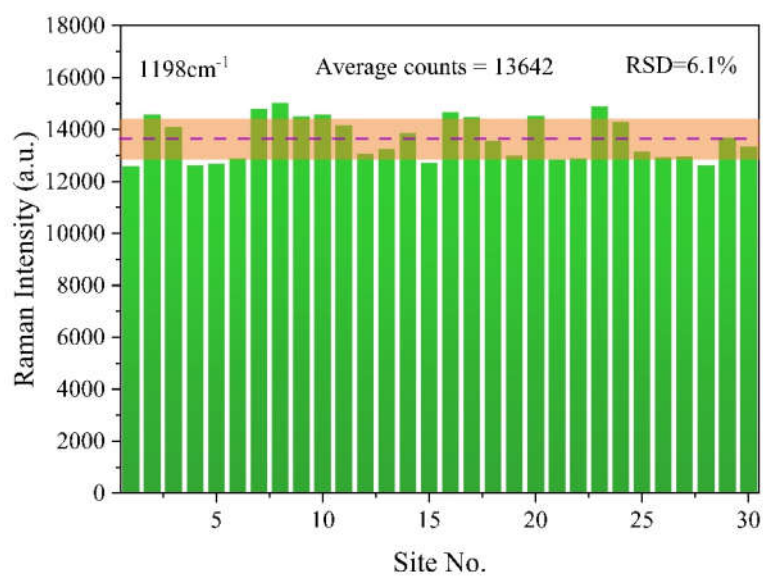

**Figure S6.** The signal intensity distribution at 1198 cm<sup>-1</sup> for 10<sup>-6</sup> M BPE recorded from 30 sites.

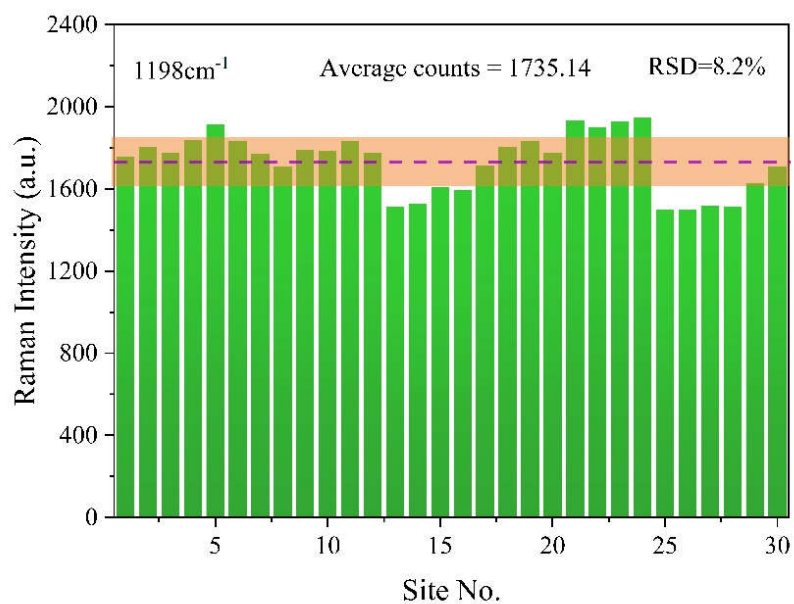

**Figure S7.** The signal intensity distribution at 1198 cm<sup>-1</sup> for 10<sup>-9</sup> M BPE recorded from 30 sites.

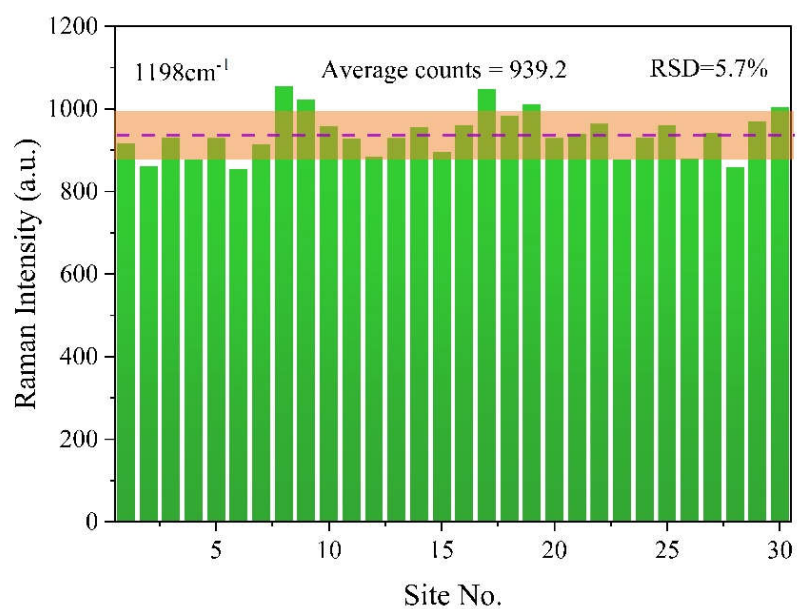

**Figure S8.** The signal intensity distribution at 1198 cm<sup>-1</sup> for 10<sup>-10</sup> M BPE recorded from 30 sites.

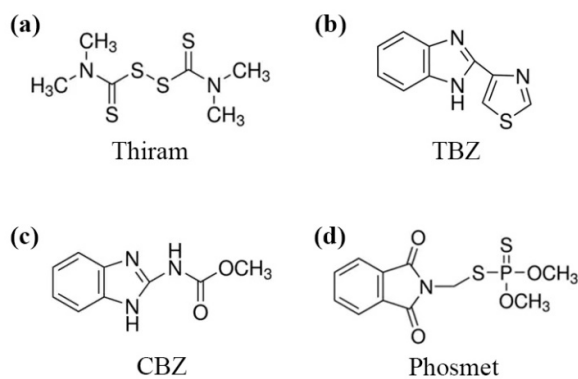

**Figure S9.** The chemical structures of thiram, TBZ, CBZ, and phosmet.

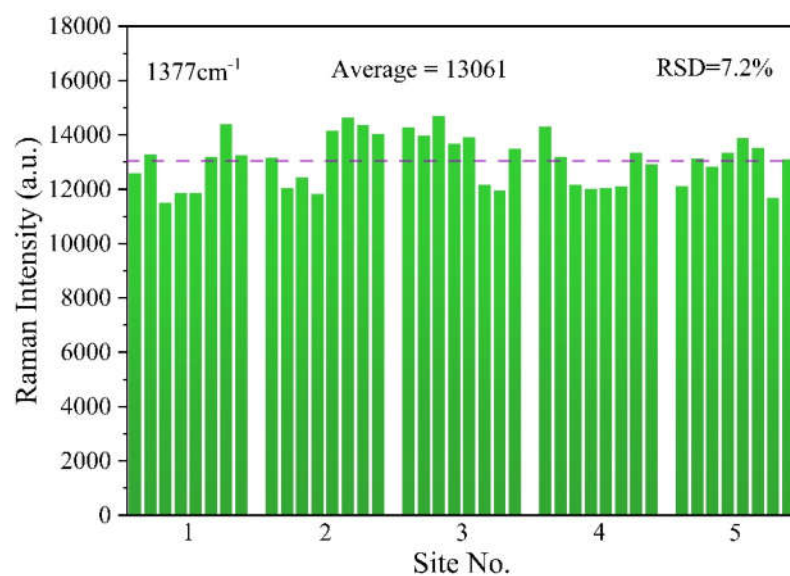

**Figure S10.** The signal intensity distribution at 1377 cm<sup>-1</sup> for 10<sup>-5</sup> M thiram. Five batches of substrates in parallel were utilized, and eight different laser spots on each substrate were chosen to yield SERS signals.

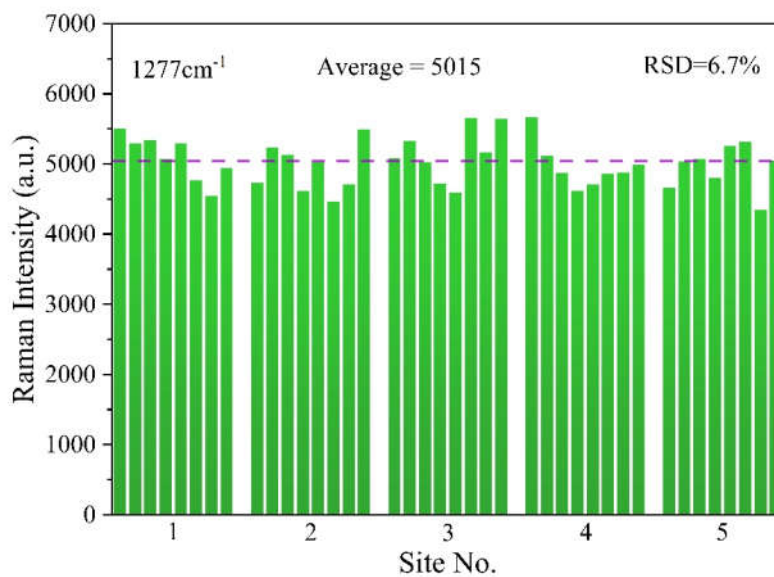

**Figure S11.** The signal intensity distribution at 1277 cm<sup>-1</sup> for 10<sup>-5</sup> M TBZ. Five batches of substrates in parallel were utilized, and eight different laser spots on each substrate were chosen to yield SERS signals.

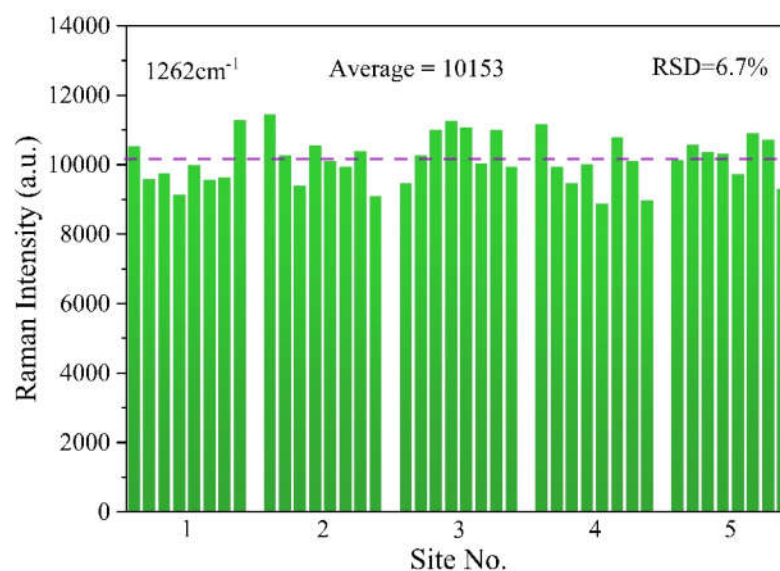

**Figure S12.** The signal intensity distribution at 1262 cm<sup>-1</sup> for 10<sup>-5</sup> M CBZ. Five batches of substrates in parallel were utilized, and eight different laser spots on each substrate were chosen to yield SERS signals.

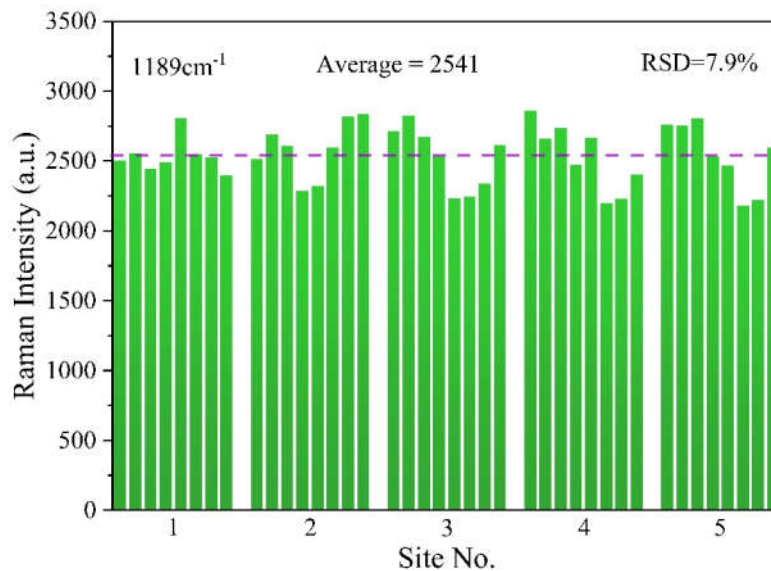

**Figure S13.** The signal intensity distribution at 1189 cm<sup>-1</sup> for 10<sup>-5</sup> M phosmet. Five batches of substrates in parallel were utilized, and eight different laser spots on each substrate were chosen to yield SERS signals.



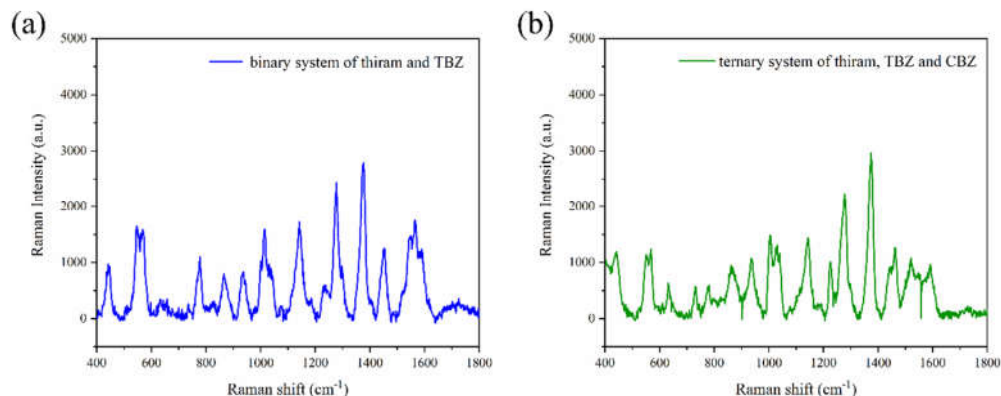

**Figure S14.** SERS spectrum obtained from (a) binary mixture system of thiram and TBZ; (b) ternary mixture system of thiram, TBZ and CBZ.

**Table S1.** Assignments of SERS bands of thiram.

| SERS peaks            | Assignments of SERS bands                                                   |
|-----------------------|-----------------------------------------------------------------------------|
| 866 $\text{cm}^{-1}$  | stretching of C-N                                                           |
| 935 $\text{cm}^{-1}$  | stretching of CH <sub>3</sub> N and C=S                                     |
| 1043 $\text{cm}^{-1}$ | stretching of CH <sub>3</sub> N and rocking CH <sub>3</sub> mode            |
| 1142 $\text{cm}^{-1}$ | stretching of C-N and rocking CH <sub>3</sub> mode                          |
| 1377 $\text{cm}^{-1}$ | stretching of C-N and symmetric CH <sub>3</sub> deformation                 |
| 1444 $\text{cm}^{-1}$ | antisymmetric bending CH <sub>3</sub> deformation                           |
| 1501 $\text{cm}^{-1}$ | stretching of C-N, CH <sub>3</sub> bending and rocking CH <sub>3</sub> mode |

**Table S2.** Assignments of SERS bands of TBZ.

| SERS peaks            | Assignments of SERS bands                     |
|-----------------------|-----------------------------------------------|
| 780 $\text{cm}^{-1}$  | stretching of C-H and C-N bending             |
| 875 $\text{cm}^{-1}$  | stretching of S-C and deformation of C-C ring |
| 1012 $\text{cm}^{-1}$ | stretching of C-N and N=C-N bending           |
| 1277 $\text{cm}^{-1}$ | C-H bending and ring stretching               |
| 1404 $\text{cm}^{-1}$ | stretching of C=C                             |
| 1588 $\text{cm}^{-1}$ | stretching of C=C                             |
| 1454 $\text{cm}^{-1}$ | stretching of C=N                             |

**Table S3.** Assignments of SERS bands of CBZ.

| SERS peaks            | Assignments of SERS bands                                               |
|-----------------------|-------------------------------------------------------------------------|
| 633 $\text{cm}^{-1}$  | ring stretching and C=C bending                                         |
| 731 $\text{cm}^{-1}$  | C-H wagging                                                             |
| 1003 $\text{cm}^{-1}$ | C-N bending and stretching of C-C and C-O-CH <sub>3</sub> stretching    |
| 1028 $\text{cm}^{-1}$ | C=N bending and stretching of C-C and stretching of C-O-CH <sub>3</sub> |
| 1224 $\text{cm}^{-1}$ | stretching of C-C, C-H bending and N-H bending                          |
| 1262 $\text{cm}^{-1}$ | N-H bending and C-H bending                                             |
| 1463 $\text{cm}^{-1}$ | N-H bending and C-H bending                                             |
| 1523 $\text{cm}^{-1}$ | N-H bending and stretching of C-N                                       |



**Table S4.** Assignments of SERS bands of Phosmet.

| SERS peaks            | Assignments of SERS bands                                |
|-----------------------|----------------------------------------------------------|
| 502 cm <sup>-1</sup>  | rocking vibration of CH <sub>2</sub> and PO <sub>2</sub> |
| 604 cm <sup>-1</sup>  | plane deformation vibrations of C=O                      |
| 650 cm <sup>-1</sup>  | plane deformation vibrations of P=S                      |
| 711 cm <sup>-1</sup>  | vibrations of benzene rings                              |
| 1014 cm <sup>-1</sup> | asymmetric stretching of P–O–C                           |
| 1189 cm <sup>-1</sup> | plane deformation vibrations of C–N                      |
| 1775 cm <sup>-1</sup> | stretching of C=O                                        |

**Table S5.** Identification results on the verification set.

| ACC (%) | Models    | Thiram |
|---------|-----------|--------|
| 100     | SVM       | ✓      |
|         | RF        | ✓      |
|         | KNN       | ✓      |
|         | RF-1D-CNN | ✓      |

**Table S6.** Identification of thiram in mixtures of thiram and TBZ.

| Mixture                        | Models    | ACC (%) | Sensitivity (%) | Specificity (%) |
|--------------------------------|-----------|---------|-----------------|-----------------|
| Thiram + TBZ ratio:<br>5%:95%  | SVM       | 77.5    | 55              | 100             |
|                                | RF        | 55      | 10              | 100             |
|                                | KNN       | 87.5    | 75              | 100             |
|                                | RF-1D-CNN | 100     | 100             | 100             |
| Thiram + TBZ ratio:<br>10%:90% | SVM       | 82.5    | 65              | 100             |
|                                | RF        | 100     | 100             | 100             |
|                                | KNN       | 90      | 100             | 80              |
|                                | RF-1D-CNN | 100     | 100             | 100             |
